# Supplementary material for: Retention of functional variation despite extreme genomic erosion: MHC allelic repertoires in the Lynx genus
Source: PubMed Central journal article supplement (PMC5496644; doi:10.1186/s12862-017-1006-z), 2017-07-04
Supplement: 12862_2017_1006_MOESM2_ESM.pdf [file 12862_2017_1006_MOESM2_ESM.pdf]

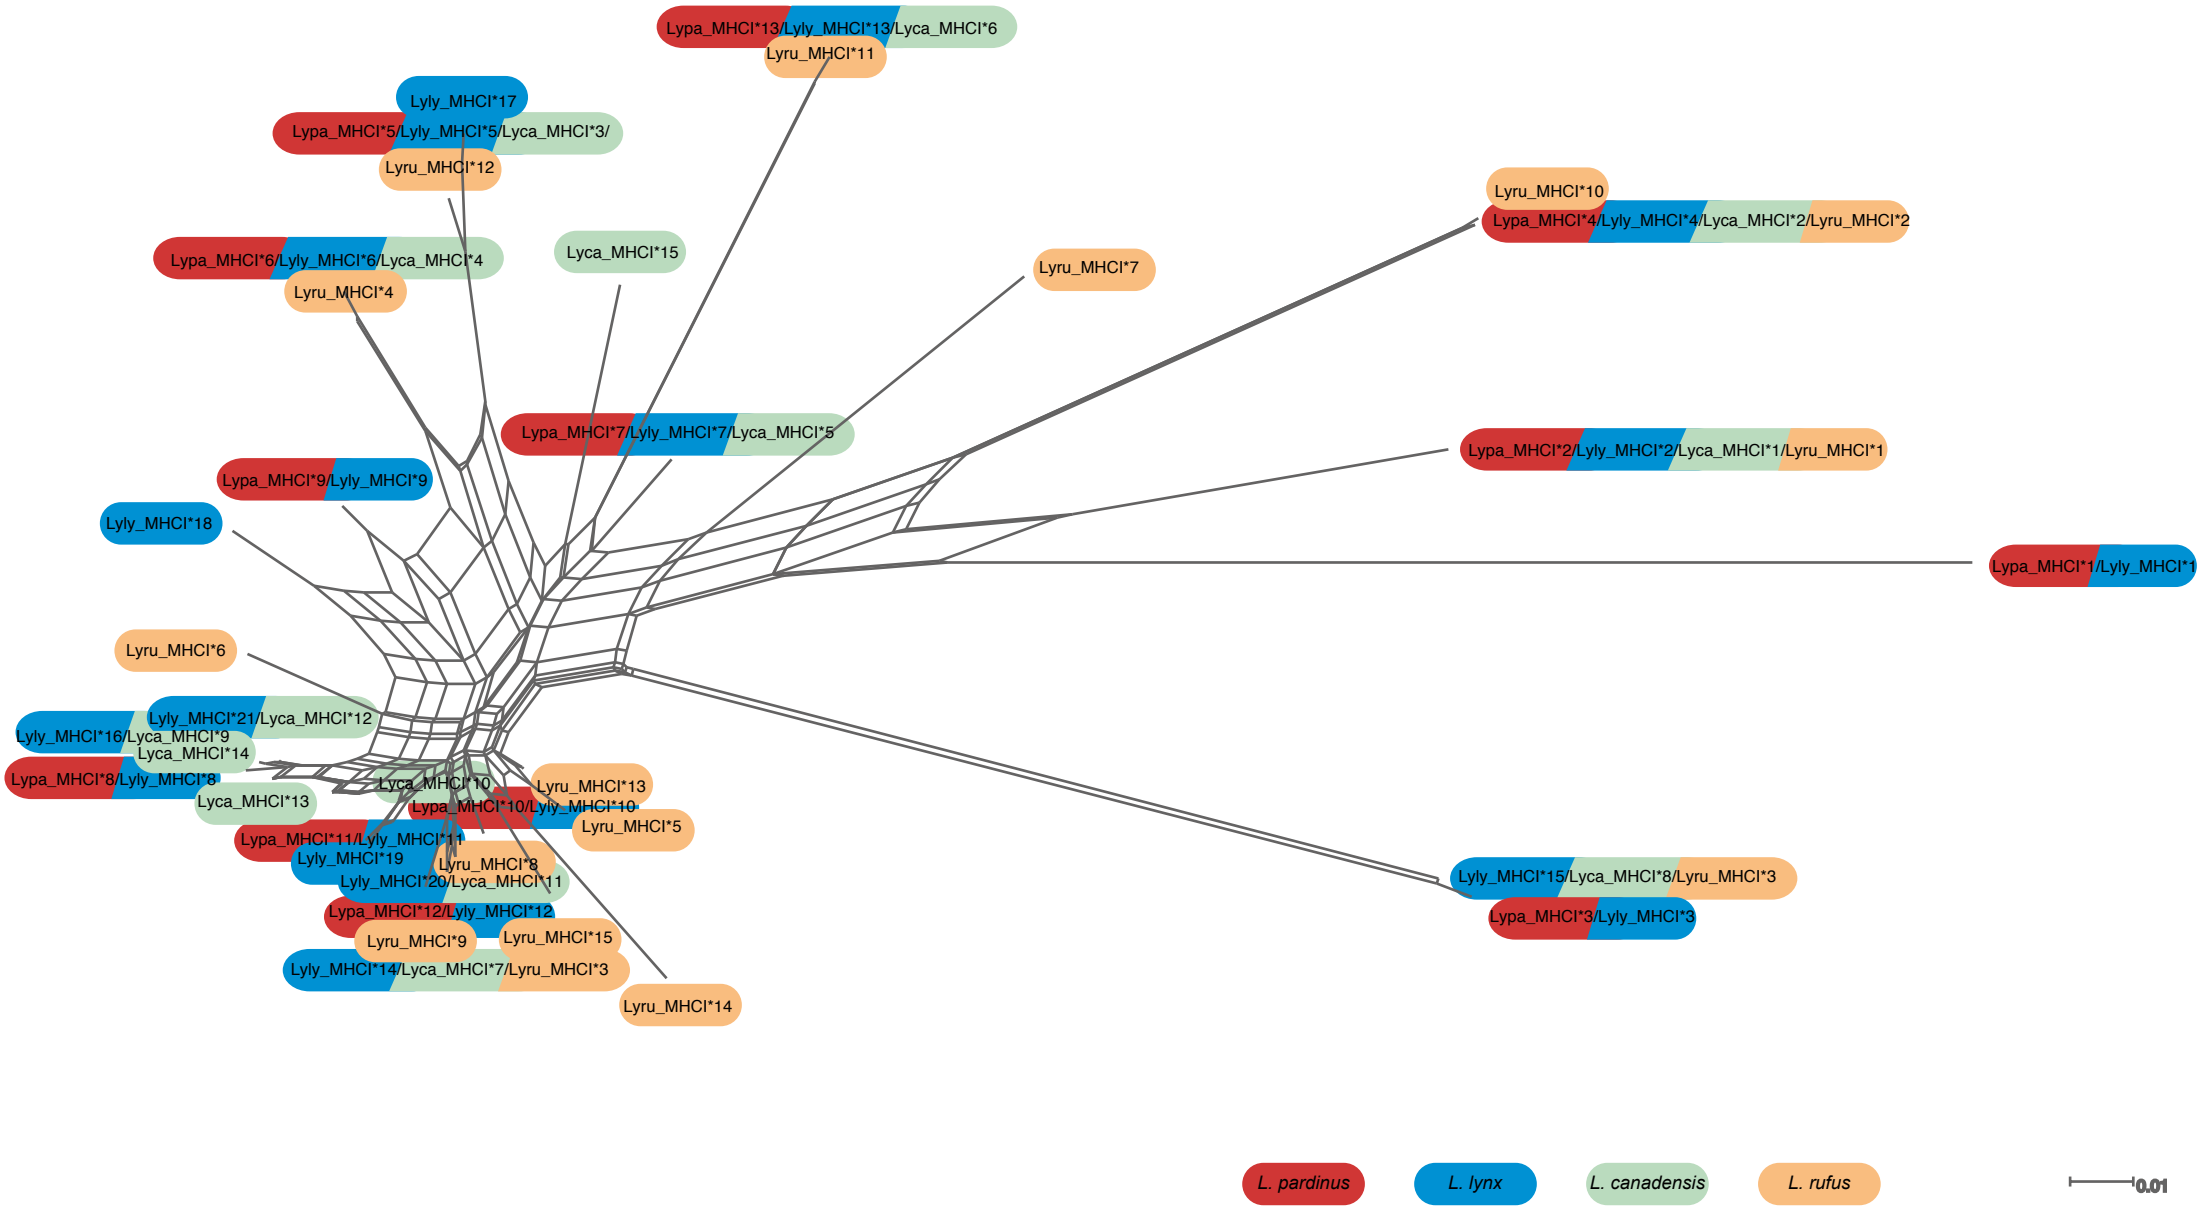

**Figure S1. Phylogenetic network of Lynx MHCII alleles.** We constructed a network with the Neighbor-Net method and Jukes-Cantor distances in SplitsTree4. Alleles are colored by species of origin.

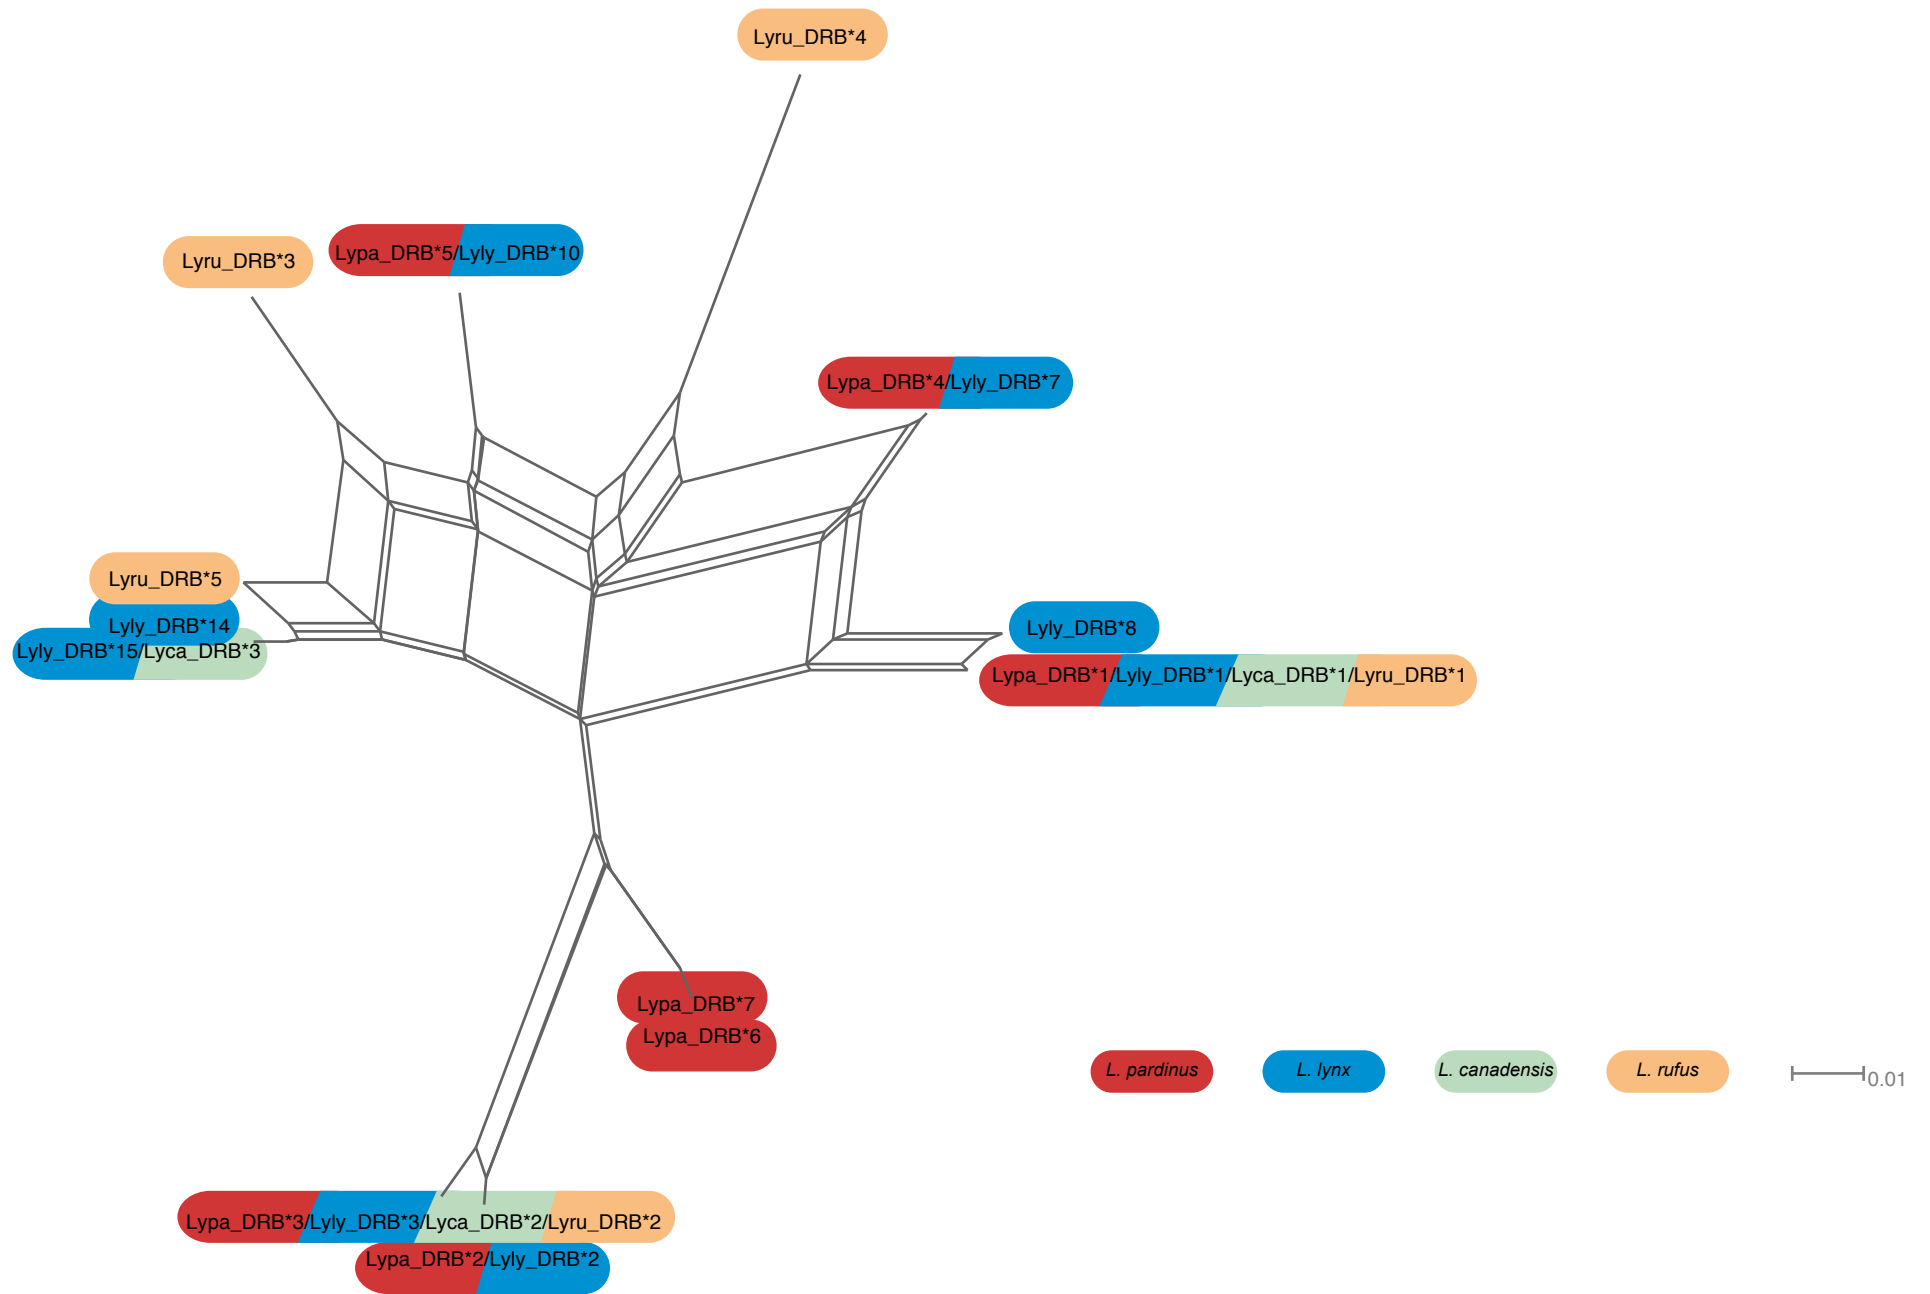

**Figure S2. Phylogenetic network of Lynx MHCII-DRB alleles.** We constructed a network with the Neighbor-Net method and Jukes-Cantor distances in SplitsTree4. Alleles are colored by species of origin.

Other Felidae species

*Panthera*

*Leopardus*

*Acinonyx*

*Felis*

Lynx genus species

*L. rufus*

*L. canadensis*

*L. lynx*

*L. pardinus*

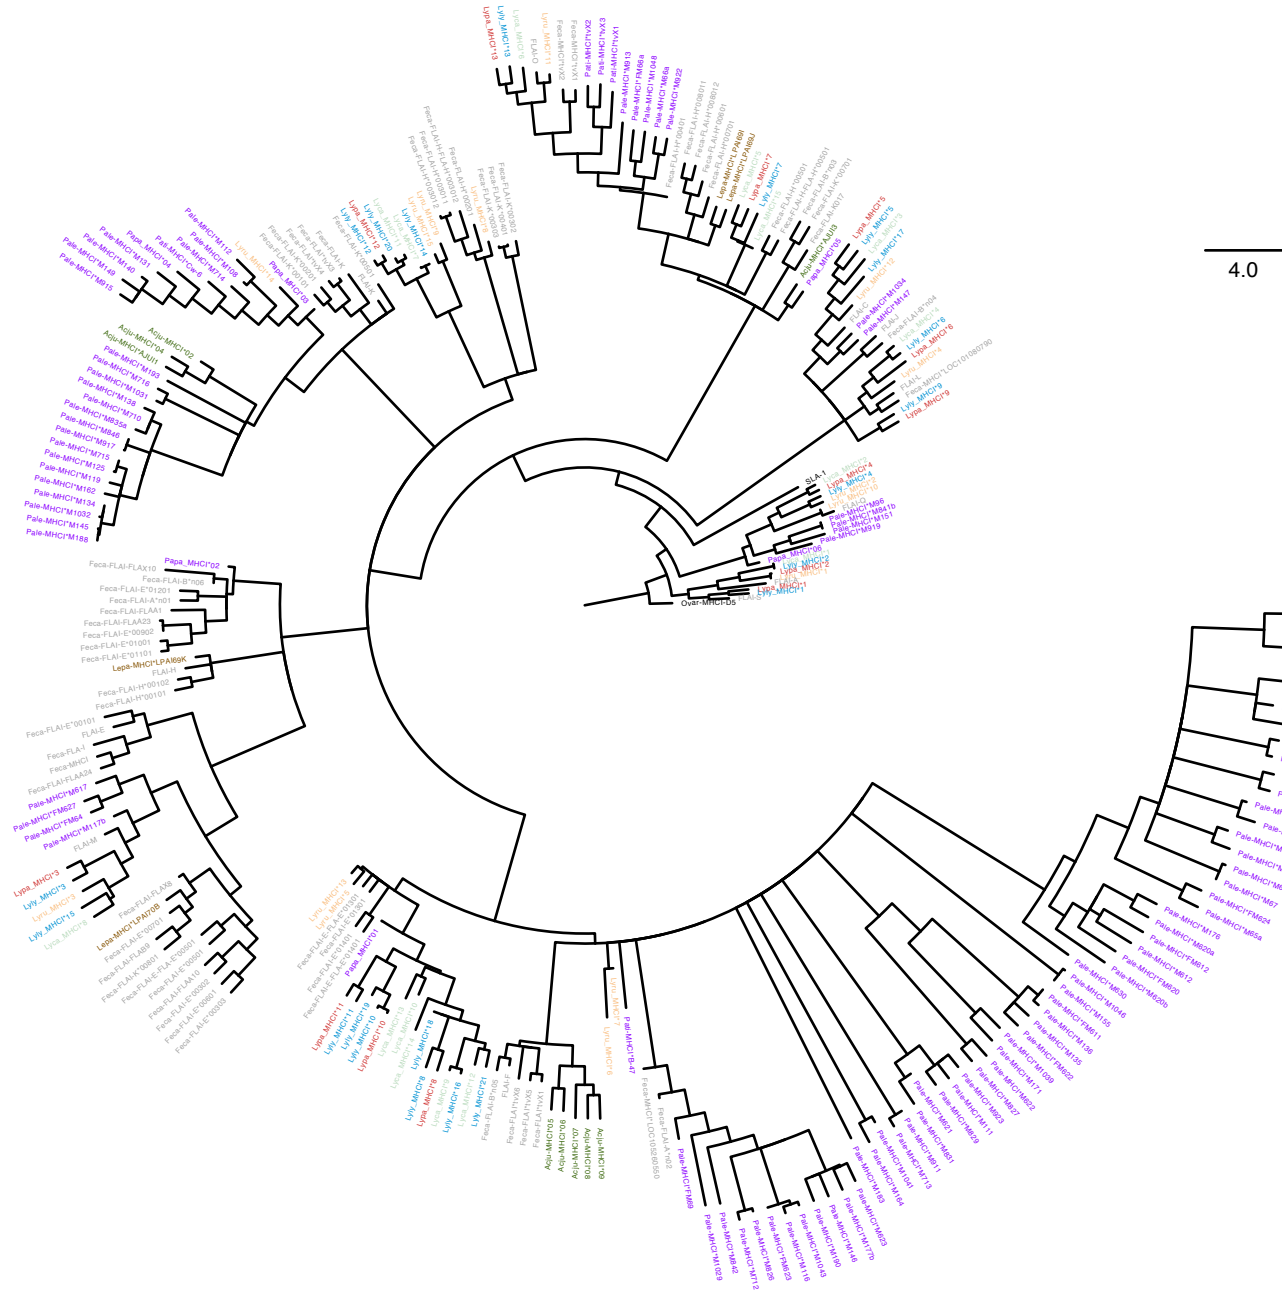

Figure S3. Phylogenetic tree of Felidae MHC1 alleles. The tree was constructed with RaxML. Tips are colored by genus of origin.

Other Felidae species

*Panthera*

*Leopardus*

*Acinonyx*

*Felis*

*Prionailurus*

*Neofelis*

*Otocolovus*

Lynx genus species

*L. rufus*

*L. canadensis*

*L. lynx*

*L. pardinus*

Lineage\*1

Lineage\*2

Lineage\*3

Lineage\*4

Lineage\*5

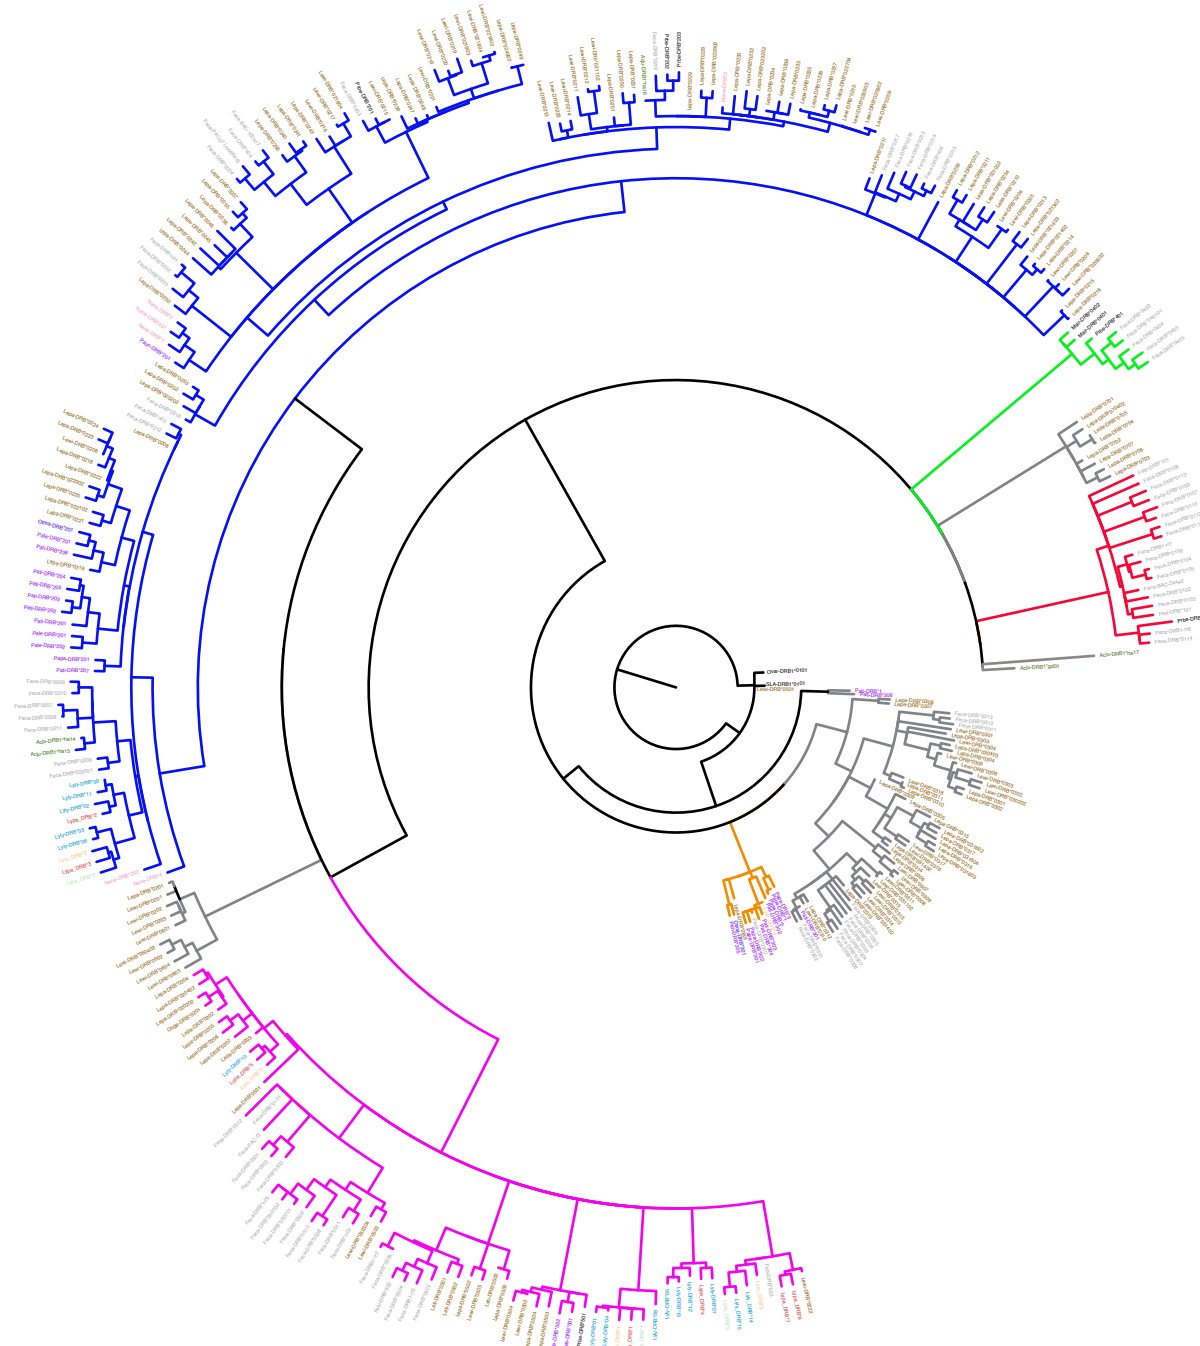

**Figure S4. Phylogenetic tree of Felidae MHCII\_DRB alleles.** The tree was constructed with RaxML. Tips are colored by genus of origin.

1. Yuhki N, OBrien SJ: Nature and origin of polymorphism in feline MHC class II DRA and DRB genes. J Immunol 1997, 158(6):2822-2833.
2. Wei K, Zhang ZH, Wang XF, Zhang WP, Xu X, Shen FJ, Yue BS: Lineage pattern, trans-species polymorphism, and selection pressure among the major lineages of feline Mhc-DRB peptide-binding region. Immunogenetics 2010, 62(5):307-317.

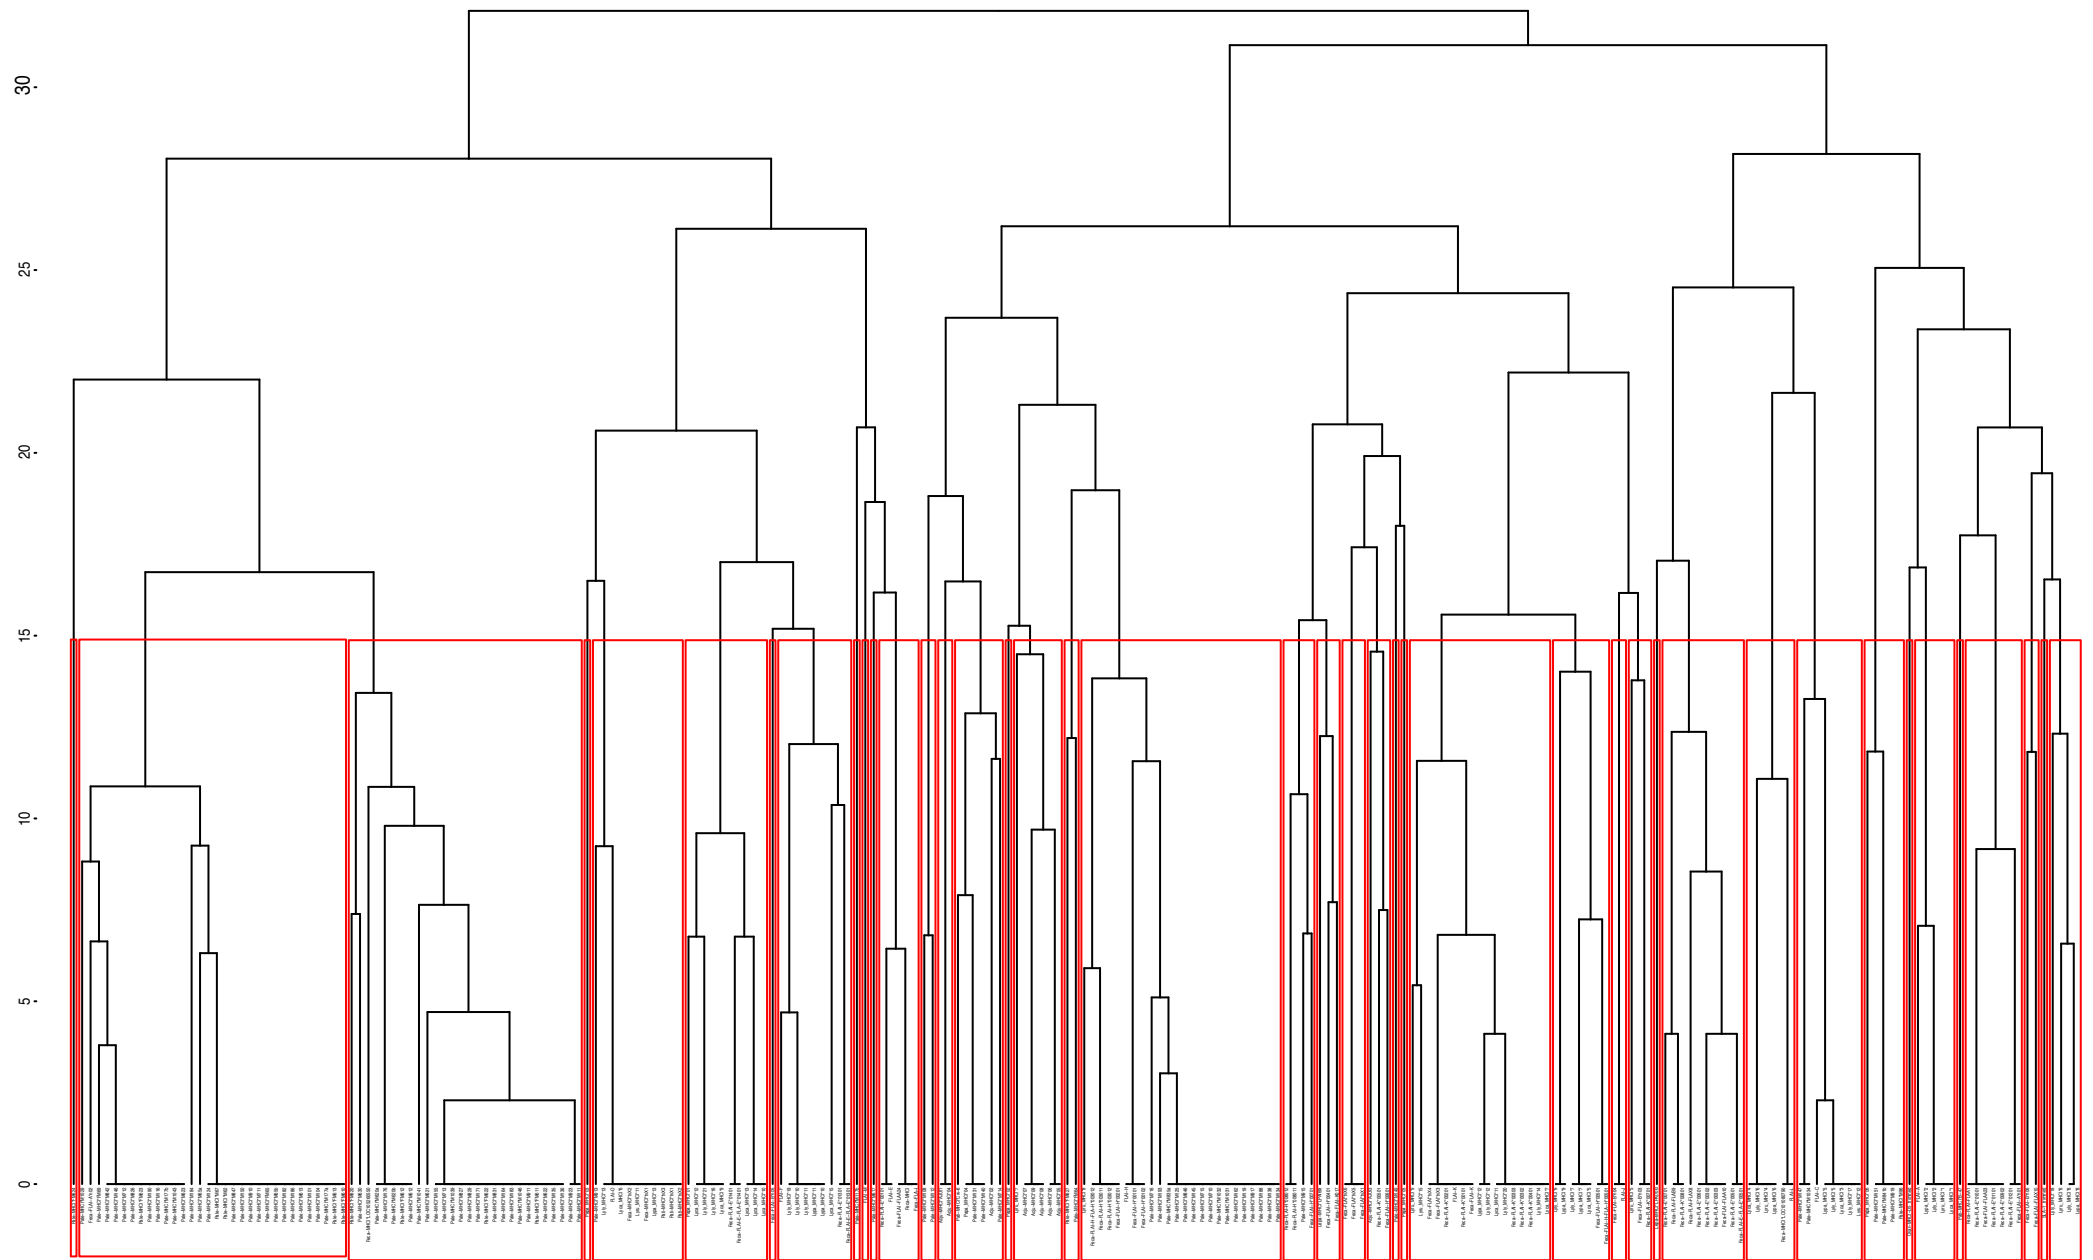

**Figure S5. Felidae MHC I supertype definition.** We used average hierarchical clustering and a cut-off threshold of Euclidean distance  $\geq 15$  to classify alleles into distinctive functional groups (supertypes, red boxes) based on functional similarity at their ABS. Alleles with identical amino acids at ABS are represented as tip polytomies at 0 Euclidean distance.

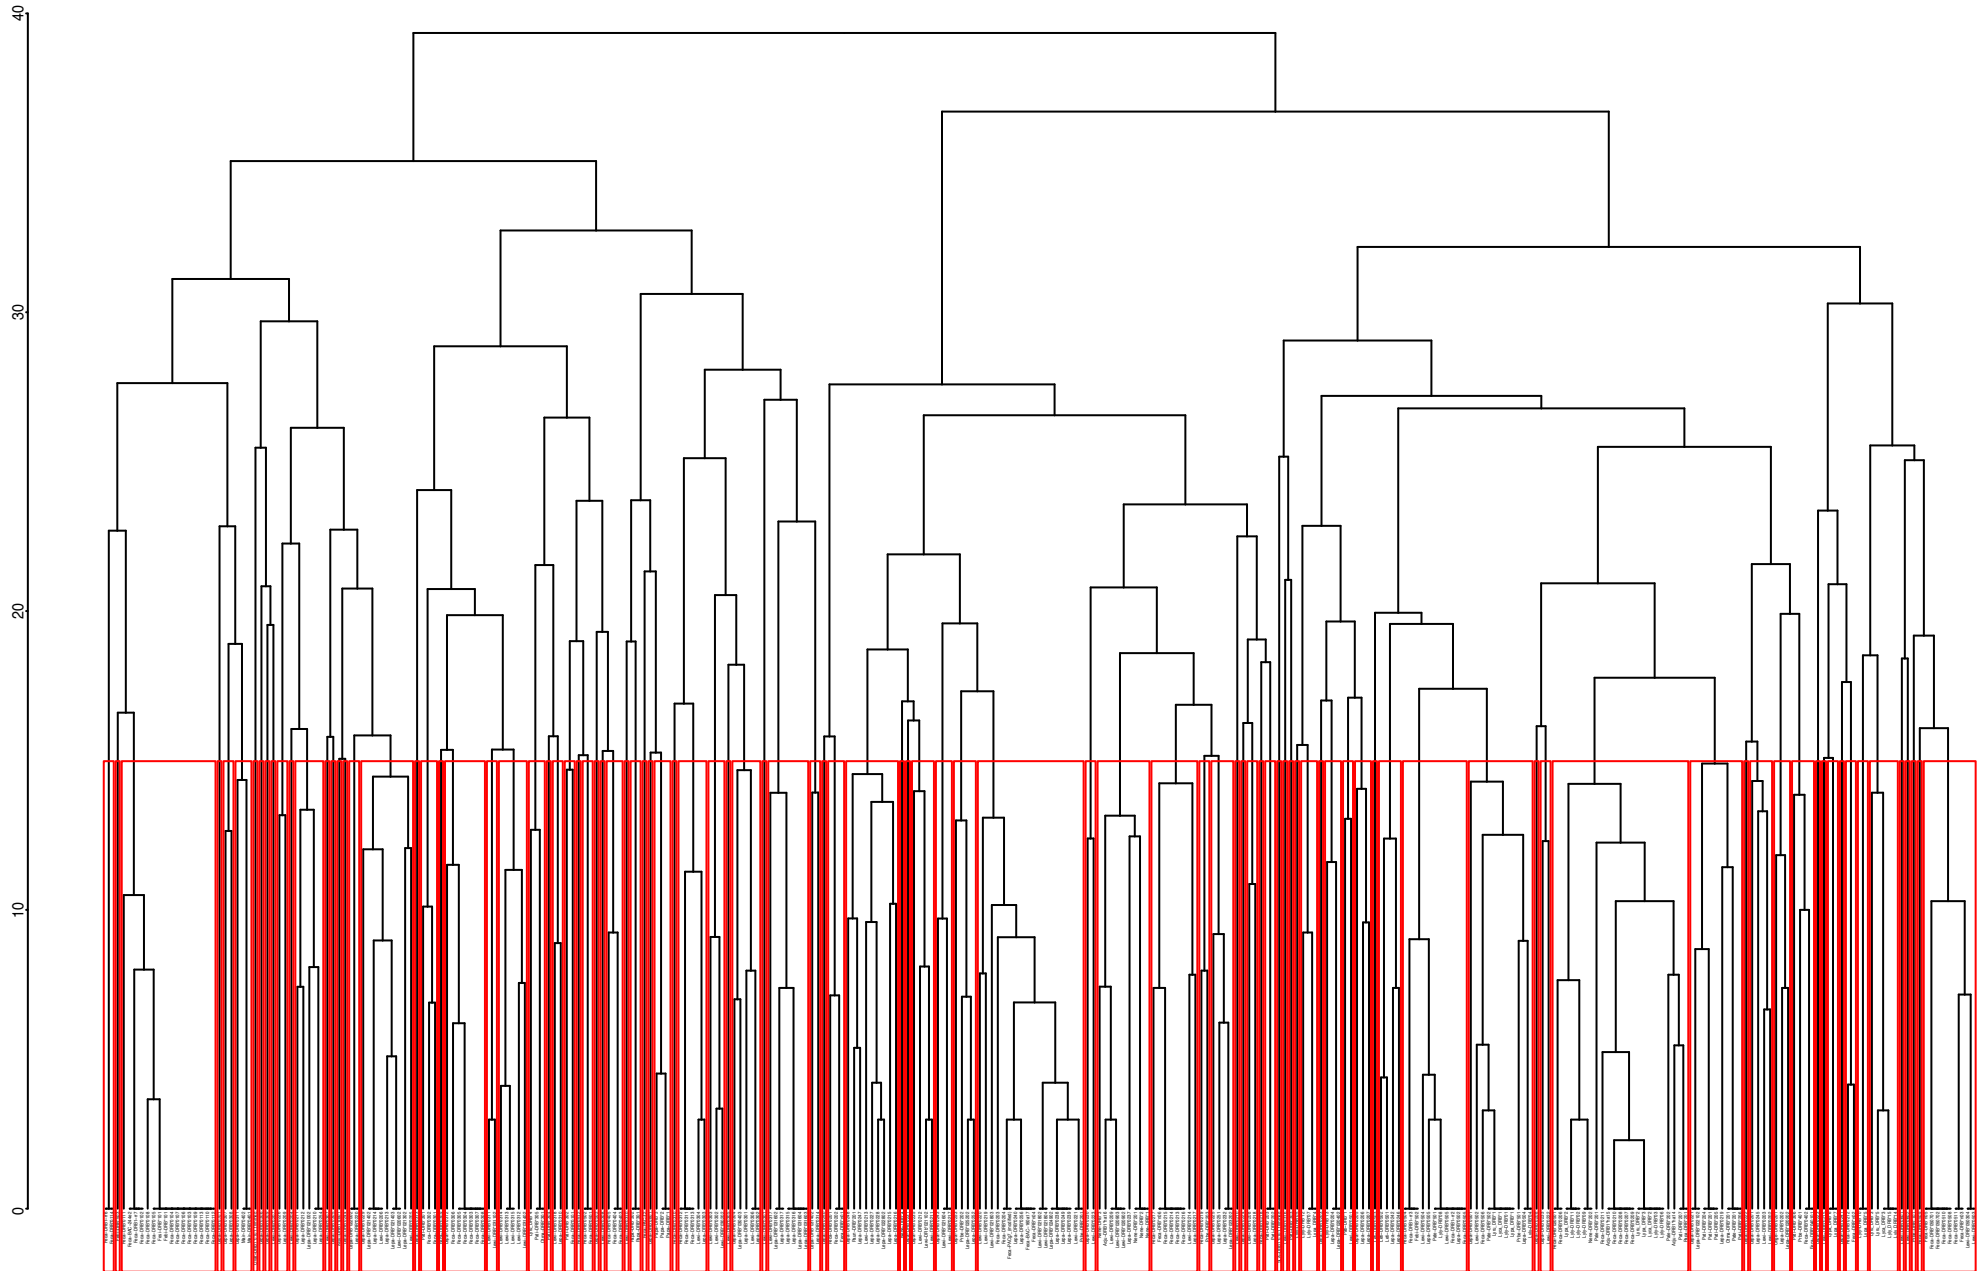

**Figure S6. Felidae MHCII-DRB supertype definition.** We used average hierarchical clustering and a cut-off threshold of Euclidean distance  $\geq 15$  to classify alleles into distinctive functional groups (supertypes, red boxes) based on functional similarity at their ABS. Alleles with identical amino acids at ABS are represented as polytomies at 0 euclidean distance.
